# Supplementary material for: Community composition shapes microbial-specific phenotypes in a cystic fibrosis polymicrobial model system
Source: eLife. 2023 Jan 20;12:e81604. doi: 10.7554/eLife.81604 (PMC9897730; doi:10.7554/eLife.81604)
Supplement: Figure 1—figure supplement 3—source data 1. — Data presented in Figure 1—figure supplement 3 represents the average of six biological replicates, each with three technical replicates performed at least on three different days. For each microorganism grown in the mixed communities, the log10 geometric mean value of the three biological replicates was transformed to colony forming unit (CFU)/mL counts and divided by the total CFU/mL of the community (total community). Data visualization was done using GraphPad Prism 9 (version 9.2.0). [file elife-81604-fig1-figsupp3-data1.xlsx]

## Sheet: Figure 1 - figure supplement 3
CFU/mL	Pa						Staph						Strep						Prev
Sa (B)							2.44667e+08	3e+08	1.88889e+08	4.77778e+08	2.55556e+08	3.11111e+08
Strep (B)													5.77778e+07	8.88888e+07	8.88888e+06	6.88889e+07	3.66667e+07	5.55556e+07
Prev (B)
Pa (B)	2.44333e+08	2e+08	4.22222e+08	4.33333e+08	2.66667e+08	2e+08													1	1	1	1	1	1
Mix (B)	1.33333e+08	1.33111e+08	6.88889e+08	3.55556e+08	1.44444e+08	1.55556e+08	1.11111e+08	5.33334e+07	1.07778e+08	2.22222e+08	1.55556e+08	1.66667e+08	2.33333e+08	6.33333e+07	2.11111e+08	4.22222e+08	2.21111e+08	1.66667e+08	1.88889e+06	422222	316228	2.11111e+06	1.77778e+06	777778
Pa (P)	3.55555e+08	1.33333e+08	1.55556e+08	5.55556e+07	8.44444e+07	7.77778e+07
Sa (P)							8.88888e+07	1.22222e+08	6.33333e+07	2.22222e+06	4.33333e+07	3.44444e+07
Strep (P)													2.22222e+08	4.77778e+07	1.55556e+08	1.44444e+08	1.11111e+08	3.11111e+08
Prev (P)																			1	1	1	1	1	1
Mix (P)	6.66667e+07	2e+07	3e+07	4.33333e+07	6.44444e+07	5.33333e+07	3.55556e+06	1.66667e+07	1.22222e+07	5.88889e+06	5.33333e+06	10000000	6.66667e+07	4.22222e+07	8.88888e+07	4.22222e+07	4.22222e+07	1.11111e+08	555556	455555	288889	833333	6.77778e+06	6.88889e+06
Starting CFU counts				Geo mean
Pa	1.88889e+07	7.33333e+06	7.66667e+06	1.02025e+07
Staph	1.33333e+07	277778	1.1e+07	3.44093e+06
Strep	422222	2.88889e+06	1.33333e+06	1.17599e+06
Prev	1.33333e+06	9e+06	8.22222e+06	4.62087e+06
Productivity	CFU final-CFU initial
CFU/mL	Pa						Staph						Strep						Prev
Sa (B)							2.41226e+08	2.96559e+08	1.85448e+08	4.74337e+08	2.52115e+08	3.0767e+08
Strep (B)													5.66018e+07	8.77128e+07	7.71289e+06	6.77129e+07	3.54907e+07	5.43796e+07
Prev (B)																			-4.62087e+06	-4.62087e+06	-4.62087e+06	-4.62087e+06	-4.62087e+06	-4.62087e+06
Pa (B)	2.3413e+08	1.89798e+08	4.1202e+08	4.23131e+08	2.56464e+08	1.89798e+08
Mix (B)	1.23131e+08	1.22909e+08	6.78686e+08	3.45353e+08	1.34242e+08	1.45353e+08	1.0767e+08	4.98924e+07	1.04337e+08	2.18781e+08	1.52115e+08	1.63226e+08	2.32157e+08	6.21573e+07	2.09935e+08	4.21046e+08	2.19935e+08	1.65491e+08	-2.73198e+06	-4.19864e+06	-4.30464e+06	-2.50976e+06	-2.84309e+06	-3.84309e+06
Pa (P)	3.45353e+08	1.23131e+08	1.45353e+08	4.53531e+07	7.4242e+07	6.75753e+07
Sa (P)							8.54479e+07	1.18782e+08	5.98923e+07	-1.21871e+06	3.98924e+07	3.10035e+07
Strep (P)													2.21046e+08	4.66018e+07	1.5438e+08	1.43268e+08	1.09935e+08	3.09935e+08
Prev (P)																			-4.62087e+06	-4.62087e+06	-4.62087e+06	-4.62087e+06	-4.62087e+06	-4.62087e+06
Mix (P)	5.64642e+07	9.79754e+06	1.97975e+07	3.31309e+07	5.4242e+07	4.31309e+07	114626	1.32257e+07	8.78128e+06	2.44795e+06	1.8924e+06	6.55907e+06	6.54907e+07	4.10462e+07	8.77128e+07	4.10462e+07	4.10462e+07	1.09935e+08	-4.06531e+06	-4.16531e+06	-4.33198e+06	-3.78753e+06	2.15691e+06	2.26802e+06
Sum
CFU/mL	Sum of mono (Theoretical Productivity)						Sum of Mixes (Observed Productivity)
R1-B	5.27337e+08						4.60226e+08
R2-B	5.69448e+08						2.3076e+08
R3-B	6.00559e+08						9.88653e+08
R4-B	9.6056e+08						9.82671e+08
R5-B	5.39449e+08						5.03449e+08
R6-B	5.47226e+08						4.70226e+08
R1-P	6.47226e+08						1.18004e+08
R2-P	2.83893e+08						5.99042e+07
R3-P	3.55004e+08						1.1196e+08
R4-P	1.82782e+08						7.28375e+07
R5-P	2.19449e+08						9.93375e+07
R6-P	4.03893e+08						1.61893e+08
