# Supplementary material for: Community composition shapes microbial-specific phenotypes in a cystic fibrosis polymicrobial model system
Source: eLife. 2023 Jan 20;12:e81604. doi: 10.7554/eLife.81604 (PMC9897730; doi:10.7554/eLife.81604)
Supplement: Figure 1—figure supplement 4—source data 1. — Data presented in Figure 1—figure supplement 4 represents the average of three biological replicates, each with three technical replicates performed on three different days. For each microorganism grown in the mixed communities, the log10 geometric mean value of the three biological replicates was transformed to colony forming unit (CFU)/mL counts and divided by the total CFU/mL of the community (total community). Data visualization was done using GraphPad Prism 9 (version 9.2.0). [file elife-81604-fig1-figsupp4-data1.xlsx]

## Sheet: Figure 1 - Fig supplement 4B
		1:10 Pa:others			10:1 Pa:others			100:1 Pa:others			1000:1 Pa others
	Pseudomonas aeruginosa	7.73595	7.89086	8.31058	8.38818	8.36798	8.27621	8.52288	8.4437	8.49292	8.57724	8.42597	8.47712		Log 10 CFU
	Staphylococcus aureus	8.24988	8.67923	8.62554	7.27621	7.34679	7.42597	6.69897	6.69897	6.80163	5.65854	5.76176	5.77003
	Streptococcus sanguinis	7.50816	7.77003	7.57724	7.61396	8.08715	7.85867	8.04576	8.32451	7.97004	8.22185	8.22185	7.87827
	Prevotella melaninogenica	6.4437	6.65854	6.4437	6.61396	6.77815	7.12494	6.50816	6.69897	7.57724	6.40749	6.71786	7.77815
	Pseudomonas aeruginosa	5.44444e+07	7.77778e+07	2.04444e+08	2.44444e+08	2.33333e+08	1.88889e+08	3.33333e+08	2.77778e+08	3.11111e+08	3.77778e+08	2.66667e+08	3e+08		CFU per mL
	Staphylococcus aureus	1.77778e+08	4.77778e+08	4.22222e+08	1.88889e+07	2.22222e+07	2.66667e+07	5e+06	5e+06	6.33333e+06	455556	577778	588889
	Streptococcus sanguinis	3.22222e+07	5.88889e+07	3.77778e+07	4.11111e+07	1.22222e+08	7.22222e+07	1.11111e+08	2.11111e+08	9.33333e+07	1.66667e+08	1.66667e+08	7.55556e+07
	Prevotella melaninogenica	2.77778e+06	4.55556e+06	2.77778e+06	4.11111e+06	6e+06	1.33333e+07	3.22222e+06	5e+06	3.77778e+07	2.55556e+06	5.22222e+06	6e+07
	TOTAL	2.67222e+08	6.19e+08	6.67222e+08	3.08556e+08	3.83778e+08	3.01111e+08	4.52667e+08	4.98889e+08	4.48556e+08	5.47456e+08	4.39133e+08	4.36144e+08
	Pseudomonas aeruginosa	0.203742	0.125651	0.306411	0.792222	0.607991	0.627306	0.736377	0.556793	0.693584	0.690061	0.607257	0.687846		Relative abundance (%)
	Staphylococcus aureus	0.665281	0.771854	0.632806	0.0612171	0.0579039	0.0885609	0.0110457	0.0100223	0.0141194	0.000832132	0.00131572	0.00135022
	Streptococcus sanguinis	0.120582	0.0951355	0.0566195	0.133237	0.318471	0.239852	0.245459	0.423163	0.208075	0.304439	0.379535	0.173235
	Prevotella melaninogenica	0.010395	0.00735954	0.0041632	0.0133237	0.015634	0.0442804	0.00711831	0.0100223	0.084221	0.00466806	0.0118921	0.137569
	Pseudomonas aeruginosa	0.211935			0.67584			0.662251			0.661721				Mean
	Staphylococcus aureus	0.68998			0.0692273			0.0117291			0.00116602
	Streptococcus sanguinis	0.090779			0.23052			0.292232			0.285736
	Prevotella melaninogenica	0.00730592			0.0244127			0.0337872			0.0513764
	Pseudomonas aeruginosa	0.0906584			0.101252			0.0938026			0.0471806				STDEV
	Staphylococcus aureus	0.0727403			0.0168251			0.00213235			0.000289672
	Streptococcus sanguinis	0.0322031			0.092969			0.114919			0.104414
	Prevotella melaninogenica	0.00311625			0.0172447			0.0437011			0.0747324
